# Supplementary material for: Undifferentiated arthritis: a changing population who did not benefit from enhanced disease-modifying anti-rheumatic drug strategies—results from a 25 year longitudinal inception cohort
Source: PubMed Central journal article supplement — Rheumatology (Oxford). 2021 Nov 30;61(8):3212–22. doi: 10.1093/rheumatology/keab880 (PMC9348769; doi:10.1093/rheumatology/keab880), 2021-11-30
Supplement: keab880_supplementary_data.pdf [file keab880_supplementary_data.pdf]

## **Supplementary files**

S1. Baseline characteristics of early arthritis patients with a clinical diagnosis of UA changed over time

S2. Baseline characteristics UA-patients excluded from the study population

S3. Disease activity scores during follow-up, compared to 1993-1997

S4. Components of the disease activity scores during follow-up, compared to 1993-1997

S5. Functional disability during follow-up, compared to 1993-1997

S6. Fatigue and pain during follow-up, compared to 1993-1997

S7. prolonged DMARD-free status within 5-years of follow-up

S8. Sensitivity analyses stratified for ACPA-status

**S1. Baseline characteristics of early arthritis patients with a clinical diagnosis of UA changed over time**

|                                       | <b>Total</b><br>N = 1626 | <b>1998-2005</b><br>N = 479 | <b>2006-2010</b><br>N = 447 | <b>2011-2014</b><br>N = 393 | <b>2015-2019</b><br>N = 307 |
|---------------------------------------|--------------------------|-----------------------------|-----------------------------|-----------------------------|-----------------------------|
| <b>Age (years), mean (SD)</b>         | 51 (17)                  | 51 (17)                     | 53 (16)                     | 54 (16)                     | 58 (16)                     |
| <b>Gender (female), %</b>             | 55                       | 62                          | 66                          | 68                          | 59                          |
| <b>Symptom duration, median (IQR)</b> | 14 (6-29)                | 19 (9-35)                   | 17 (7-31)                   | 10 (4-27)                   | 11 (6-21)                   |
| <b>ACPA-positive, %</b>               | 19                       | 29                          | 22                          | 11                          | 9                           |
| <b>RF-positive, %</b>                 | 24                       | 31                          | 26                          | 21                          | 16                          |
| <b>SJC (0-44), median (IQR)</b>       | 3 (1-6)                  | 3 (1-7)                     | 3 (1-7)                     | 3 (1-6)                     | 2 (1-5)                     |
| <b>TJC (0-53), median (IQR)</b>       | 5 (1-12)                 | 7 (2-14)                    | 7 (3-13)                    | 4 (2-10)                    | 4 (2-9)                     |
| <b>CRP, median (IQR)</b>              | 7 (3-20)                 | 8 (3-22)                    | 7 (3-22)                    | 5 (3-16)                    | 6 (3-17)                    |
| <b>VAS (0-100), median (IQR)</b>      | 34 (18-55)               | 34 (17-54)                  | 31 (12-53)                  | 40 (20-60)                  | 30 (20-50)                  |
| <b>DAS28CRP, median (IQR)</b>         | 3.8 (3.0-4.6)            | 3.9 (3.1-4.7)               | 3.8 (3.0-4.7)               | 3.7 (3.0-4.4)               | 3.6 (2.8-4.3)               |
| <b>HAQ-DI, median (IQR)</b>           | 0.63 (0.25-1.13)         | 0.63 (0.25-1.08)            | 0.72 (0.25-1.17)            | 0.63 (0.25-1.15)            | 0.65 (0.25-1.25)            |

**Legend:** Baseline characteristics of all UA-patients with a clinical diagnosis of UA, defined by their treating rheumatologist. Over time, UA-patients became more frequently autoantibody-negative, had less affected joints and less often elevated acute-phase-reactants. Missing values were imputed and used for baseline table; values represent mean of the imputed medians calculated using Rubin's rules.

*ACPA: anticitrullinated protein antibody, CRP: C-reactive protein, DAS: disease activity score, ESR: estimated sedimentation rate, HAQ-DI: health assessment questionnaire disability index, SJC: swollen joint count, TJC: tender joint count, VAS: visual analogue scale.*

## S2. Baseline characteristics of UA-patients excluded from the study population

|                                   | Study population<br>N = 1132 | Excluded UA-patients<br>N = 127 |
|-----------------------------------|------------------------------|---------------------------------|
| Age (years), mean (SD)            | 52 (17)                      | 51 (16)                         |
| Gender (female), %                | 59                           | 55                              |
| Sympt. dur. (weeks), median (IQR) | 11 (4-26)                    | 20 (9-32)*                      |
| ACPA-positive, %                  | 5                            | 15*                             |
| RF-positive, %                    | 7                            | 16*                             |
| SJC (0-28), median (IQR)          | 1 (1-3)                      | 2 (1-3)                         |
| TJC (0-28), median (IQR)          | 2 (1-4)                      | 4 (2-5)*                        |
| CRP, median (IQR)                 | 6 (3-17)                     | 8 (3-24)                        |
| VAS (0-100), median (IQR)         | 30 (14-50)                   | 30 (15-53)                      |
| DAS28CRP, median (IQR)            | 3.3 (2.7-3.9)                | 3.6 (3.1-4.2)*                  |
| HAQ-DI, median (IQR)              | 0.50 (0.13-0.91)             | 0.9 (0.4-1.3)*                  |

**Legend:** Baseline characteristics of UA-patients excluded from the study population due to trial participation (n=127), compared to baseline characteristics of the study population. Baseline characteristics were compared using ANOVA or Kruskal Wallis, as appropriate. The excluded UA-patients were more often auto-antibody positive and had higher disease activity at baseline, which would be expected due to trial inclusion criteria. \* p<0.05

*ACPA: anticitrullinated protein antibody, CRP: C-reactive protein, DAS: disease activity score, ESR: estimated sedimentation rate, HAQ-DI: health assessment questionnaire disability index, SJC: swollen joint count, TJC: tender joint count, VAS: visual analogue scale.*

### S3. Disease activity scores during follow-up, compared to 1993-1997

| Inclusion period | DAS28CRP at baseline | p-value | Decline in first year | p-value | DAS28CRP after 1 year       | p-value      |
|------------------|----------------------|---------|-----------------------|---------|-----------------------------|--------------|
| 1993 – 1997      | Ref.                 | Ref.    | Ref.                  | Ref.    | Ref.                        | Ref.         |
| 1998 – 2005      | +0.05 (-0.13, +0.22) | 0.606   | +0.12 (-0.17, +0.40)  | 0.426   | +0.07 (-0.14, +0.26)        | 0.539        |
| 2006 – 2010      | +0.01 (-0.16, +0.18) | 0.875   | -0.07 (-0.38, +0.24)  | 0.653   | +0.02 (-0.19, +0.24)        | 0.838        |
| 2011 - 2014      | -0.13 (-0.29, +0.03) | 0.112   | -0.07 (-0.32, +0.18)  | 0.564   | <b>-0.18 (-0.36, -0.00)</b> | <b>0.047</b> |
| 2015 – 2019      | -0.10 (-0.26, +0.06) | 0.227   | -0.13 (-0.38, +0.13)  | 0.322   | <b>-0.25 (-0.44, -0.07)</b> | <b>0.007</b> |

**Legend:** Differences in baseline DAS28CRP, decline in the first year in DAS28CRP and levels for the subsequent follow-up afterwards, compared to the earliest inclusion period (1993-1997), corrected for age and gender, visualized as estimated marginal means (95%CI). Estimated marginal mean for DAS28CRP in the period 1993-1997 at baseline is 3.35 (95% CI, 3.22-3.48) and 2.63 (95% CI, 2.54-2.84) for the subsequent follow-up afterwards.

*CRP: C-reactive protein, DAS: disease activity score*

#### S4. Components of the disease activity scores during follow-up, compared to 1993-1997

| Inclusion period | SJC28 at baseline           | p-value      | Decline in first year | p-value | SJC28 after 1 year          | p-value         |
|------------------|-----------------------------|--------------|-----------------------|---------|-----------------------------|-----------------|
| 1993 – 1997      | Ref.                        | Ref.         | Ref.                  | Ref.    | Ref.                        | Ref.            |
| 1999 – 2005      | -0.06 (-0.48, +0.37)        | 0.796        | +0.41 (-0.28, +1.10)  | 0.245   | +0.12 (-0.34, +0.59)        | 0.602           |
| 2006 – 2010      | -0.13 (-0.58, +0.32)        | 0.576        | -0.26 (-1.00, +0.49)  | 0.504   | -0.32 (-0.82, +0.18)        | 0.206           |
| 2011 - 2014      | <b>-0.45 (-0.83, -0.06)</b> | <b>0.023</b> | -0.24 (-0.85, +0.37)  | 0.439   | <b>-0.77 (-1.18, -0.37)</b> | <b>&lt;0.01</b> |
| 2015 – 2019      | <b>-0.47 (-0.88, -0.06)</b> | <b>0.025</b> | -0.46 (-1.08, +0.16)  | 0.149   | <b>-0.92 (-1.36, -0.48)</b> | <b>&lt;0.01</b> |

  

| Inclusion period | TJC28 at baseline    | p-value | Decline in first year | p-value | TJC28 after 1 year   | p-value |
|------------------|----------------------|---------|-----------------------|---------|----------------------|---------|
| 1993 – 1997      | Ref.                 | Ref.    | Ref.                  | Ref.    | Ref.                 | Ref.    |
| 1999 – 2005      | +0.06 (-0.62, +0.74) | 0.361   | +0.64 (-0.37, +1.64)  | 0.213   | +0.45 (-0.34, +1.23) | 0.267   |
| 2006 – 2010      | +0.10 (-0.56, +0.78) | 0.511   | -0.32 (-0.74, +1.38)  | 0.556   | +0.50 (-0.30, +1.29) | 0.219   |
| 2011 - 2014      | -0.17 (-0.77, +0.40) | 0.421   | -0.14 (-1.00, +0.72)  | 0.747   | -0.42 (-1.07, +0.22) | 0.197   |
| 2015 – 2019      | -0.00 (-0.58, +0.62) | 0.405   | -0.58 (-1.47, +0.31)  | 0.202   | -0.58 (-1.27, +0.11) | 0.102   |

  

| Inclusion period | CRP at baseline           | p-value          | Decline in first year | p-value | CRP after 1 year         | p-value      |
|------------------|---------------------------|------------------|-----------------------|---------|--------------------------|--------------|
| 1993 – 1997      | Ref.                      | Ref.             | Ref.                  | Ref.    | Ref.                     | Ref.         |
| 1999 – 2005      | 1.5 (-2.4, +5.3)          | 0.445            | -0.9 (-6.9, +5.1)     | 0.796   | -0.9 (-4.7, +3.0)        | 0.658        |
| 2006 – 2010      | +2.1 (-1.7, +5.8)         | 0.280            | -4.5 (-11.9, +2.8)    | 0.224   | -2.3 (-6.3, +1.6)        | 0.251        |
| 2011 - 2014      | <b>-6.0 (-9.6, -2.5)</b>  | <b>0.001</b>     | +2.2 (-2.9, +7.4)     | 0.397   | <b>-4.0 (-7.5, -0.6)</b> | <b>0.022</b> |
| 2015 – 2019      | <b>-7.0 (-10.7, -3.3)</b> | <b>&lt;0.001</b> | +5.2 (-0.2, +10.6)    | 0.058   | <b>-4.0 (-7.7, -0.3)</b> | <b>0.036</b> |

  

| Inclusion period | VAS at baseline      | p-value | Decline in first year | p-value | VAS after 1 year     | p-value |
|------------------|----------------------|---------|-----------------------|---------|----------------------|---------|
| 1993 – 1997      | Ref.                 | Ref.    | Ref.                  | Ref.    | Ref.                 | Ref.    |
| 1999 – 2005      | +0.32 (-4.29, +4.93) | 0.891   | +1.37 (-6.66, +9.41)  | 0.737   | -0.28 (-5.57, +5.02) | 0.918   |
| 2006 – 2010      | -4.36 (-8.75, +0.02) | 0.051   | -3.23 (-4.92, +11.39) | 0.436   | +1.20 (-3.91, +6.13) | 0.644   |
| 2011 - 2014      | -0.03 (-4.12, +4.05) | 0.987   | -1.58 (-5.00, +8.17)  | 0.637   | +3.47 (-0.94, +7.88) | 0.123   |
| 2015 – 2019      | -2.47 (-6.65, +1.70) | 0.245   | -5.09 (-1.70, +11.88) | 0.141   | +1.60 (-3.14, +6.34) | 0.507   |

## S5. Functional disability during follow-up, compared to 1993-1997

| Inclusion period | HAQ at baseline      | p-value | Decline in first year | p-value | HAQ after 1 year     | p-value |
|------------------|----------------------|---------|-----------------------|---------|----------------------|---------|
| 1993 – 1997      | Ref.                 | Ref.    | Ref.                  | Ref.    | Ref.                 | Ref.    |
| 1998 – 2005      | +0.01 (-0.11, +0.13) | 0.848   | +0.00 (-0.18, +0.19)  | 0.973   | -0.01 (-0.12, +0.11) | 0.917   |
| 2006 – 2010      | -0.01 (-0.12, +0.10) | 0.852   | -0.05 (-0.24, +0.14)  | 0.620   | -0.03 (-0.14, +0.08) | 0.628   |
| 2011 - 2014      | -0.04 (-0.14, +0.07) | 0.472   | -0.02 (-0.17, +0.14)  | 0.840   | -0.05 (-0.14, +0.05) | 0.332   |
| 2015 – 2019      | -0.01 (-0.11, +0.10) | 0.886   | -0.09 (-0.25, +0.07)  | 0.263   | -0.09 (-0.20, +0.01) | 0.086   |

**Legend:** Differences in baseline HAQ, decline in the first year in HAQ-DI and levels for the subsequent follow-up afterwards, compared to the earliest inclusion period (1993-1997), corrected for age and gender, visualized as estimated marginal means (95%CI). Estimated marginal means for HAQ-DI in 1993-1997 at baseline were 0.62 (95% CI; 0.53-0.73) and 0.44 (95%CI; 0.37-0.52) for the subsequent follow-up afterwards.

*HAQ-DI: health assessment questionnaire disability index*

S6. Fatigue and pain during follow-up, compared to 1993-1997

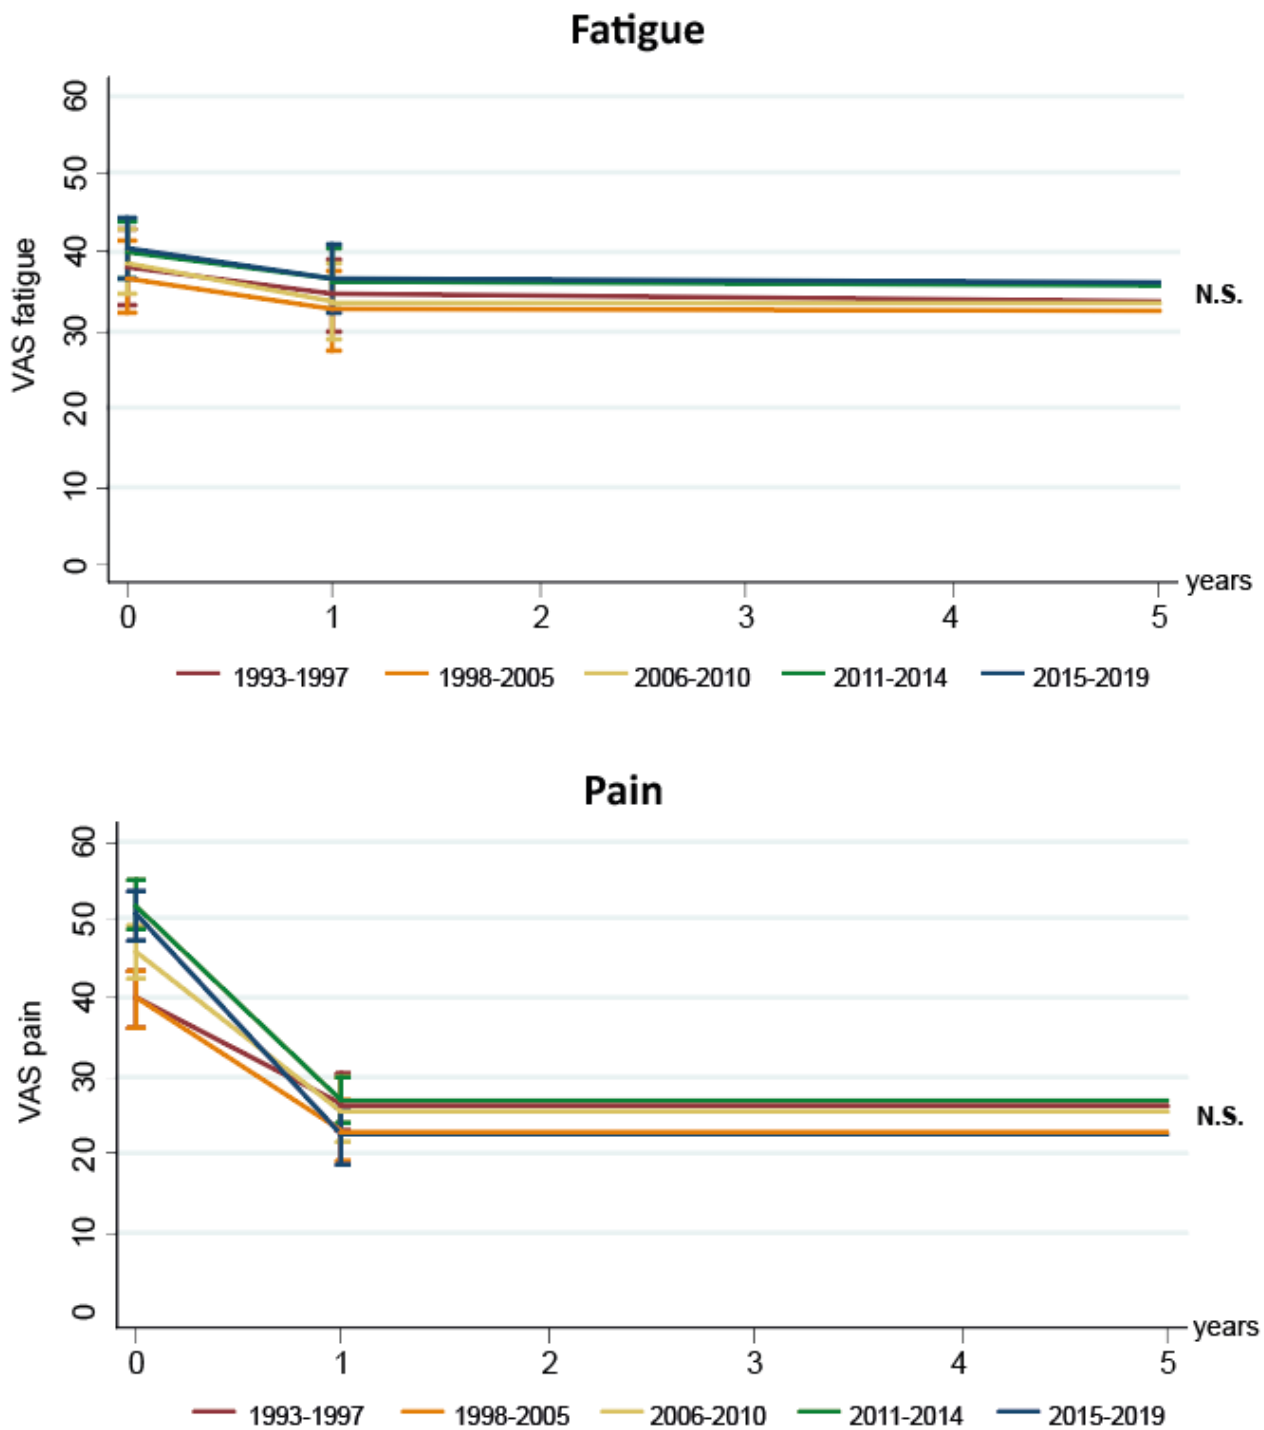

**Legend:** Fatigue and pain (measured using Visual Analogue Scale) did not improve compared to 1993-1997. Fatigue and pain VAS-scores were modelled based on the estimated marginals means which results from the age- and gender-corrected linear mixed models.

N.S.: not significant ( $p > 0.05$ )

### S7. Prolonged DMARD-free status within 5-years of follow-up

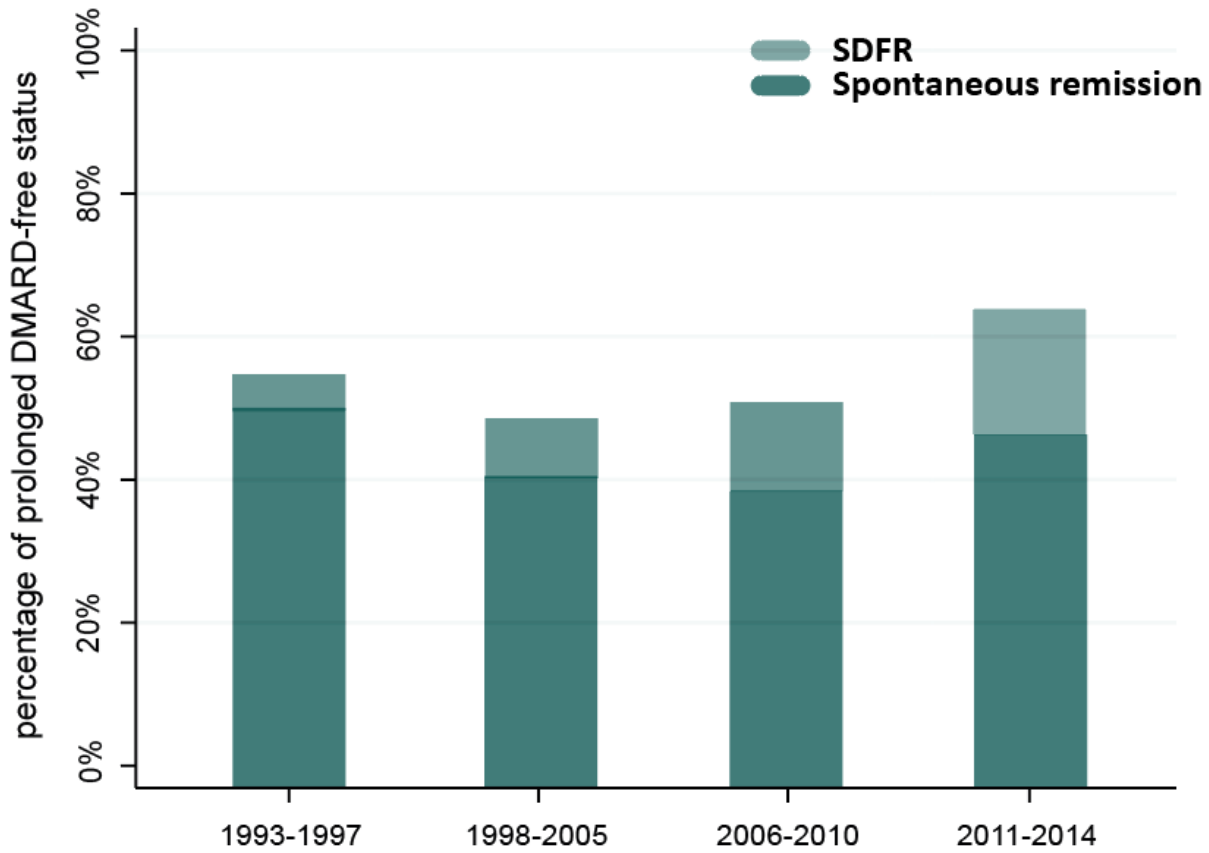

**Legend:** Percentages of prolonged DMARD-free status within 5-years of follow-up, i.e. also including the inclusion period 2011-2014. Test for trend demonstrated no significant increase in DFS-prevalence over time ( $p=0.28$ ).

*DFS: prolonged DMARD-free status, SDFR: sustained DMARD-free remission*





**Legend:** Disease activity scores over time, physical functioning over time and prolonged DMARD-free status and fulfillment of classification-criteria for RA stratified for ACPA-positive UA-patients **(A)** and ACPA-negative UA-patients **(B)**. In both ACPA-positive and ACPA-negative UA-patients disease activity scores improved over time. Among ACPA-negative UA-patients, physical functioning, prevalence of prolonged DMARD-free status and the percentage of fulfillment of classification-criteria for RA did not concomitantly improve with improved disease activity scores. Among ACPA-positive UA, physical functioning and prolonged DMARD-free status did tend to concomitantly improve over time.

DAS28CRP and HAQ-DI scores were modelled based on the estimated marginal means which results from the age- and gender-corrected linear mixed models. Due to the limited amount of follow-up data among patients included between 2006-2010, this inclusion period could not be included in the linear mixed model analysis of DAS28CRP and HAQ-DI.

*CRP: C-reactive protein, DAS: disease activity score, HAQ-DI: health assessment questionnaire disability index, DMARD: disease modifying antirheumatic drugs, RA: rheumatoid arthritis*
